# Supplementary material
Source: MDPI journal article supplement (https://www.mdpi.com/2073-4441/14/14/2267)
Supplement: s1 [file s1]

**Table S1: Correlation coefficient between physicochemical parameters and species diversity indices.**

|          | Shannon Index | Simpson's Index | Pielou's Index | Margalef's Index |
|----------|---------------|-----------------|----------------|------------------|
| pH       | -0.023        | -0.005          | 0.114          | -0.109           |
| EC       | 0.21          | 0.251           | 0.018          | 0.473            |
| Salinity | 0.305         | 0.338           | 0.096          | 0.536            |
| DO       | 0.378         | 0.352           | 0.251          | 0.336            |
| Rainfall | -0.629*       | -0.562          | -0.592*        | -0.464           |
| NDVI     | -0.174        | -0.278          | -0.509         | 0.064            |
| EVI      | -0.151        | -0.264          | -0.343         | -0.11            |
| NDWI     | -0.33         | -0.438          | -0.407         | -0.292           |
| MinTemp  | -0.237        | -0.279          | -0.519         | -0.036           |
| MaxTemp  | -0.501        | -0.566          | -0.392*        | -0.264           |

\*: Significant correlation at  $P < 0.05$ .
