# Supplementary material
Source: MDPI journal article supplement (https://www.mdpi.com/2073-4441/14/14/2267)
Supplement: s1 [file s1]

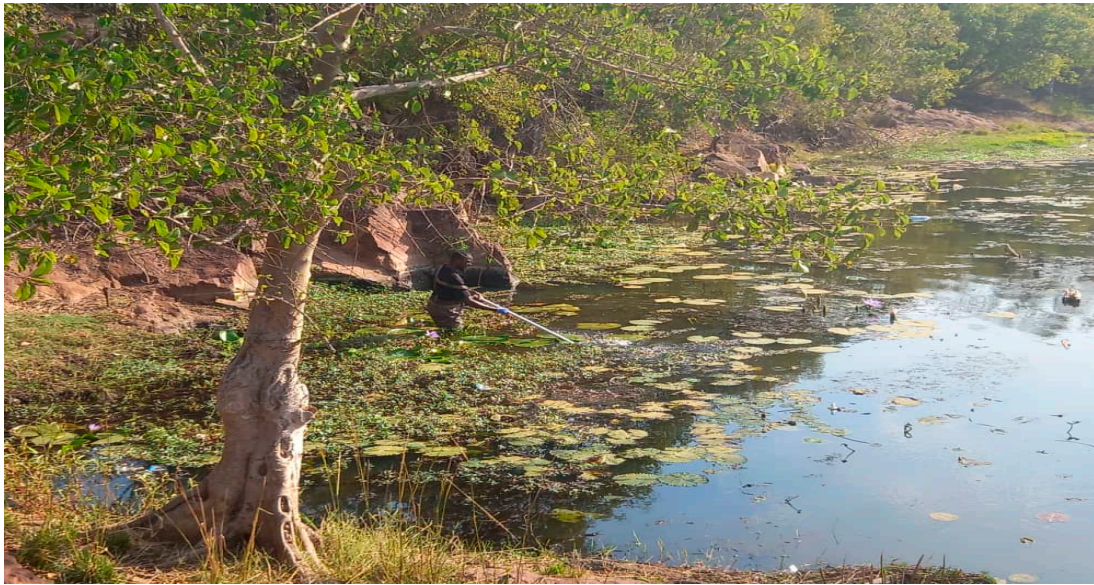

One of our sampling sites

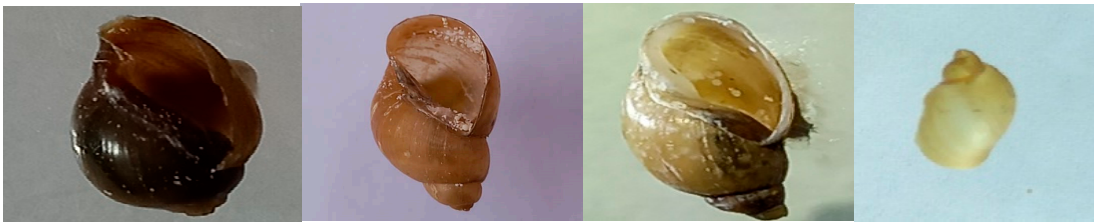

a) *Bulinus globosus*

b) *Bulinus tropicus*

b) *Physa acuta*

d) *Lymnaea natalensis*

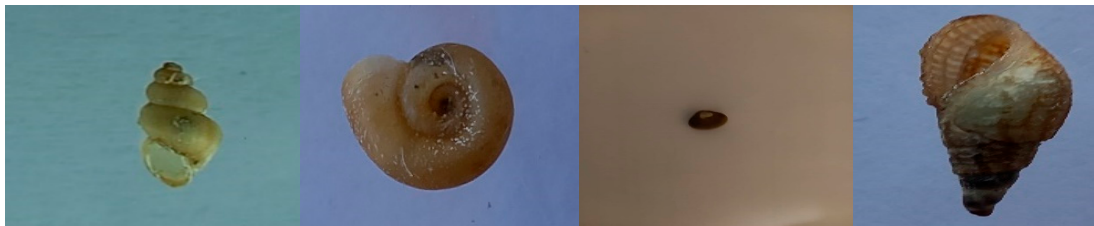

e) *Bulinus forskalii*

f) *Biomphalaria pfeifferi*

g) Bivalve

h) *Tarebia granifera*

Figure S1: Snails species collected and identified from different waterbodies in KwaZulu-Natal, South Africa.
