# Supplementary material
Source: MDPI journal article supplement (https://www.mdpi.com/2073-4441/14/14/2267)
Supplement: s1 [file s1]

**Table S2: Correlation coefficient between snail species and species diversity indices.**

|                     | Shannon Index | Simpson's Index | Pielou's Index | Margalef's Index |
|---------------------|---------------|-----------------|----------------|------------------|
| <i>B.globosus</i>   | 0.288         | 0.259           | 0.10           | 0.337            |
| <i>B.pfeifferi</i>  | 0.533         | 0.509           | 0.250          | 0.497            |
| <i>B.tropicus</i>   | 0.846*        | 0.783*          | 0.698*         | 0.771*           |
| <i>B.forskalii</i>  | 0.290         | 0.254           | 0.005          | 0.558            |
| <i>L.natalensis</i> | 0.802         | 0.790           | 0.89           | 0.547            |
| <i>T.granifera</i>  | -0.121        | -0.119          | -0.284         | -0.051           |
| <i>Bivalves</i>     | 0.564         | 0.411           | 0.41           | 0.545            |
| <i>P.acuta</i>      | 0.545         | 0.552           | 0.585          | 0.353            |

\*: Significant correlation at  $P < 0.05$ .
